1 **Rice GLUCAN SYNTHASE-LIKE5 promotes Callose deposition in Anthers to**  
2 **maintain proper Male Meiosis Initiation and Progression**

3

4 Harsha Somashekar<sup>1,2</sup>, Manaki Mimura<sup>1</sup>, Katsutoshi Tsuda<sup>1,2</sup>, Ken-Ichi Nonomura<sup>1,2, †</sup>

5 1. Plant Cytogenetics Laboratory, Department of Gene Function and Phenomics, National  
6 Institute of Genetics, Mishima, Shizuoka 411-8540, Japan

7 2. Department of Genetics, School of Life Science, The Graduate University of Advanced  
8 Studies (SOKENDAI), Mishima, Shizuoka 411-8540, Japan

9 †. Corresponding author (Tel: +81-55-981-6872, Email: [knonomur@nig.ac.jp](mailto:knonomur@nig.ac.jp))

10

11 The author responsible for distribution of materials integral to the findings presented in this  
12 article in accordance with the policy described in the Instructions for Authors  
13 (<https://academic.oup.com/plphys/pages/General-Instructions>) is Ken-Ichi Nonomura.

14

15 **Short title:** A callose role in rice male meiosis

16

17

18

19

20

21

22

23

24

25

26

27 **Abstract**

28 Callose is a plant cell-wall polysaccharide whose deposition is spatiotemporally regulated in  
29 various developmental processes and environmental stress responses. Appearance of callose  
30 in premeiotic anthers is a prominent histological hallmark for the onset of meiosis in  
31 flowering plants, whose biological role in meiosis is unknown till date. Here we show that  
32 rice GLUCAN SYNTHASE LIKE5 (OsGSL5), a callose synthase, localizes on the plasma  
33 membrane of pollen mother cells (PMCs), and is responsible for biogenesis of callose in  
34 anther locules through premeiotic and meiotic stages. In *osgsl5* mutant anthers mostly lacking  
35 callose deposition, aberrant PMCs accompanied by aggregated, unpaired or multivalent  
36 chromosomes were frequently observed, and furthermore, a considerable number of mutant  
37 PMCs untimely progress into meiosis compared to wild type PMCs. Immunostaining of  
38 meiosis-specific protein PAIR2 in premeiotic PMCs revealed precocious meiosis entry in  
39 *osgsl5* anthers. The findings of this study bestows new knowledge on function of callose in  
40 controlling timing of male meiosis initiation and progression, in addition to roles in  
41 microsporogenesis, in flowering plants.

42

43

## 44 **Introduction**

45 In flowering plants, successful pollen production involves a series of multiple complex steps.

46 An important earlier step is meiosis that takes place within microsporangium or pollen sac,

47 two pairs of which compose an anther in angiosperms (Scott et al. 2004; Zhang and Wilson,

48 2009). In rice anthers, each of four microsporangia comprises central sporogenous cells

49 (SPCs) surrounded by concentric somatic cell walls four-layered prior to male meiosis, viz.

50 tapetum, middle layer, endothecium and epidermis from inside-out respectively (Fig. 1).

51 After several mitotic divisions, SPCs mature into meiotically competent pollen mother cells

52 (PMCs), which undergo meiosis following DNA replication to halve chromosome number

53 for fertilization, while the tapetal cell (TC) layers provide metabolites and nutrients for

54 neighbouring PMCs and microspores, and eventually ends via programmed cell death

55 (Dickinson and Bell, 1976; Lei and Liu, 2020; Steer, 1977). After anther walls are four-

56 layered, a plant-specific carbohydrate callose fulfils extracellular spaces of a pollen sac

57 chamber or anther locule and surrounds PMCs at premeiotic interphase, which is a prominent

58 histological hallmark for the onset of male meiosis in flowering plants (Shivanna, 2003; Unal

59 et al. 2013).

60 Callose is made up of linear glucose residues of  $\beta$ -1,3 linkages, with some having  $\beta$ -1,6-

61 glucan branches, and functions in various aspects of plant growth and development spatio-

62 temporally (Stone and Clarke, 1992; Chen and Kim, 2009; Zavaliev et al. 2011; Piršelová

63 and Matušíková, 2013; Nedhuka, 2015). For instance, callose is involved in papillae cell-wall

64 materials at bacterial and fungal contact site (Dong et al. 2008; Voigt, 2014) and also secreted

65 at wounded plant tissues (Jacobs et al. 2003), indicating indispensable roles of callose in

66 defence against both biotic and abiotic stresses. In cell-cell signalling, callose regulates the

67 conductivity of plasmodesmata (PD), forming cytoplasmic continuums in plants (Radford et

68 al. 1998; Lucas et al. 2009; Lee and Sieburth, 2010; Zavaliev et al. 2011; Sager and Lee,  
69 2018), and thought to permit selective diffusion of apoplastic signalling (Maltby et al. 1979;  
70 Bhalla and Slattery, 1984; Yim and Bradford, 1998). From aspects of plant development,  
71 callose is deposited transiently at dividing cell plate during cytokinesis, and aids in primary  
72 wall formation between daughter cells (Stachelin and Heplar, 1996; Hong et al. 2001; Thiele  
73 et al. 2009). It is also deposited at phloem tissue to control sieve plate development and pore  
74 size of sieve tubes (Xie et al. 2011). Towards reproduction, callose helps patterning of pollen  
75 aperture and elongation of pollen tubes (Franklin-Tong, 1999; Albert et al. 2011; Qin P et al.  
76 2012; Prieu et al. 2017).

77 Several reports have revealed the importance of callose accumulation during  
78 microsporogenesis. In Arabidopsis, *CALLOSE SYNTHASE5* (*CalS5*) exerts essential functions  
79 during pollen formation stages (Dong et al. 2005). Similarly, rice gene, *GLUCAN*  
80 *SYNTHASE LIKE5* (*OsGSL5*), a homolog of *AtCalS5*, is responsible for pollen growth and  
81 development during microsporogenesis (Shi et al. 2015). Premature dissolution of callose in  
82 the rice *defective callose in meiosis1* (*dcm1*) mutant generates abnormal pollen grains with  
83 varied size and DNA content as a result of defects in meiotic cytokinesis (Zhang et al. 2018).  
84 In rice ovary, *OsGSL8* symplasmically controls unloading carbohydrates into pericarp cells  
85 of developing ovary, in addition to regulating vascular cell patterning (Song et al. 2016). In  
86 Arabidopsis, the amount of phloem-mobile GFPs, able to be unloaded onto all gynoecium  
87 cells before female meiosis, are extremely reduced around tetrad spores, suggesting physical  
88 isolation of meiocytes from other gynoecium cells probably by callose accumulation (Werner  
89 et al. 2011). In contrast, little is known about the roles of callose accumulation in premeiotic  
90 anther development and male meiosis, despite of its noticeable amounts and cross-species  
91 conservation in land plant anthers (Musial and Koscińska-Pajak, 2017; Sager and Lee 2018;  
92 Seale, 2020).

93 Our group previously reported that MEIOSIS ARRESTED AT LEPTOTENE2 (MEL2), an  
94 RNA recognition motif protein, functions in timely transition of spore mother cells to the  
95 meiotic cycle in rice (Nonomura et al. 2011). Interestingly, one of significantly  
96 downregulated genes in premeiotic *mel2* mutant anthers was *OsGSL5*, detected by  
97 transcriptome (Mimura et al. 2021) and reverse transcription quantitative PCR (RT-qPCR) of  
98 this study (Supporting table 1), and as expected, callose accumulation was largely eliminated  
99 from *mel2* anther locules during premeiosis and meiosis (Fig. S2). Among 10 rice *GSL* genes,  
100 *OsGSL5* is an only gene expressing preferentially and abundantly in anthers during meiosis  
101 and post-meiosis (Yamaguchi et al. 2006; Shi et al. 2015) (Fig. S3). These findings suggest  
102 an unknown association of callose deposition with meiotic entry control in plants.

103 This study demonstrates that *OsGSL5* is responsible for hyper callose accumulation in  
104 extracellular spaces of anther locules at premeiosis and early meiosis, in addition to the role  
105 in late meiosis and pollen development as previously reported (Shi et al. 2015), and has an  
106 indispensable role in proper initiation of male meiosis in rice.

107

108

## 109 Results

110 **OsGSL5 impacts on pollen viability and seed fertility:** The *osgsl5* mutation is reported to  
111 cause male gametophytic lethality (Shi et al. 2015), leading to no homozygous plants from  
112 self-pollination of heterozygous plants. Thus, to assess OsGSL5 impact on male sporogenesis  
113 and meiosis, we exploited CRISPR-Cas9 strategy to directly induce biallelic mutations in  
114 *OsGSL5* locus. Out of 32 CRISPR-edited plantlets screened, we obtained two independent  
115 knocked-out lines, *osgsl5-2* and *osgsl5-3*, in which 1bp (A) was inserted on the 25th exon and  
116 2bp (TA) were deleted on the 14th exon, respectively (Fig. 2A). Both *osgsl5* lines were  
117 largely comparable to wild type (WT) plants in vegetative growth and panicles and spikelets  
118 morphologies under the same condition (Fig. 2B, C), except for two weeks-later heading.  
119 However, both lines set no seeds, while WT plants had 63% fertility (Fig. 2C Table S2).  
120 Pollen viability was 0.5% and 1.2% in *osgsl5-2* and *osgsl5-3*, respectively, whereas it was  
121 90.4% in WT (Figs. 2D, S5). These results were largely consistent to those previously  
122 reported (Shi et al. 2015).

123 In WT plants, the *OsGSL5* transcript level was highest in anthers, while undetected in  
124 vegetative organs and slightly detectable in pistils (Fig. S6). It was significantly enhanced in  
125 0.4-0.5mm anthers at premeiotic interphase, three-fold more than the level in younger 0.3-  
126 0.4mm anthers which contain SPCs proliferating mitotically (mitotic SPC stage). The  
127 expression peaked at 0.5-0.6mm anthers around leptotene to pachytene. In 0.6-0.7mm anthers  
128 around diplotene to telophases I, the *OsGSL5* level was reduced to half or less of that at the  
129 former stage, and again elevated in 0.8-1.1mm anthers at tetrad and microspore stages (Fig.  
130 2E). Though the *osgsl5-2* mutant developed anthers with normal appearance (Fig. S7), the  
131 *OsGSL5* transcript level was lowered in all *gs15-2* anthers examined, and significantly  
132 reduced at premeiotic interphase, early prophase I and microspore stages (Fig. 2E).

133 Considering downregulation of *OsGSL5* transcription and reduced fertilities of pollen and  
134 seeds similarly in two independent lines, we concluded that CRISPR-Cas9-mediated  
135 frameshift mutations within *OsGSL5* coding sequence caused all above phenotypes.

136 The anther length is broadly utilized as a standard to assess meiotic events in many  
137 angiosperm species including rice, as it has a rough collinearity with respective meiotic  
138 stages (Itoh et al. 2005) (Fig. 1). To confirm that *osgsl5* mutant anthers retain this collinearity,  
139 we examined the expression profiles of tapetum-specific genes, *TIP2* (Fu et al. 2014) and  
140 *EATI* (Niu et al. 2013). The expression peaks of both genes appeared at a similar level in  
141 both WT and *osgsl5-2* anthers (Fig. S7A), noteworthy in which bimodal *EATI* expression  
142 peaks at both early meiosis and tetrad stages previously reported (Ono et al. 2018) were  
143 completely maintained even in *osgsl5-2* anthers. Furthermore, no difference in the layered  
144 structure of premeiotic anthers was observed between WT and *osgsl5* plants (Fig. S7B).  
145 These results indicate that the *osgsl5* mutation unlikely affects the collinearity between anther  
146 lengths and meiotic stages, in addition to earlier anther morphogenesis. Thus we utilized the  
147 anther length as a standard for comparison of meiotic events between WT and *osgsl5* mutants  
148 below.

149

150 **OsGSL5 impacts on callose accumulation in premeiotic and meiotic anther locules:** We  
151 monitored the detailed pattern of callose accumulation in rice meiotic anthers by aniline blue  
152 that specifically stains  $\beta$ -1,3-glucan chains. The callose amount in WT anther locules, which  
153 was at an undetectable level during mitotic SPC stage (Fig. 3A), started to fulfill the  
154 extracellular spaces between cell walls and cell membranes at both PMC-PMC junctions and  
155 PMC-TC interfaces (Fig. 3B). When PMCs entered into meiotic leptotene and zygotene,  
156 callose deposition was limited to PMC-PMC junctions (Fig. 3C, D). At subsequent pachytene  
157 to diakinesis stages, it can be seen enclosing PMCs with rounder shape (Fig. 3E-G). At dyad

158 and tetrad stages, callose was detected on newly formed equatorial cell plates in addition to  
159 outer cell surfaces (Fig. 3H-I). After release of microspores to anther locules, callose can be  
160 seen fully enclosing microspores (Fig. 3J). In both *gsl5-2* and *gsl5-3* anthers, callose signals  
161 were extremely diminished through all above stages (Fig. 3K-T).

162 A beginning stage of callose accumulation was further observed with the anti- $\beta$ -1,3-glucan  
163 (callose)-directed antibody, to trace differences in callose amount more sensitively. In young  
164 0.4-mm or less anthers, four microsporangia of a same anther sometimes show different  
165 callose patterns with each other (Fig. S8), suggesting it being at the very beginning of  
166 premeiotic callose accumulation. In this stage, locules frequently retained callose limited to  
167 PMC-PMC junctions (Fig. S8), implicating that premeiotic callose accumulation initiates  
168 around PMC-PMC junctions, but not at PMC-TC interfaces.

169

170 **Localization of Callose and OsGSL5 protein in anther locules:** To investigate spatio-  
171 temporal localization of OsGSL5 protein, we produced anti-OsGSL5 antiserum (Fig. S4) to  
172 perform co-immunostaining with the anti-callose antibody on anther sections. After initiation  
173 of callose accumulation at PMC-PMC junctions (Fig. S8), callose fulfilled extracellular  
174 spaces of both PMC-PMC and PMC-TC regions in anther locules (Fig. 4A), as observed in  
175 aniline blue staining (Fig. 3B). In contrast to callose staining, OsGSL5 localization was  
176 limited only at PMC-PMC junctions in the same anther section (Fig. 4A). In subsequent  
177 leptotene, the thick callose signal declined again at PMC-TC interfaces and became almost  
178 overlapped with OsGSL5 localization at PMC-PMC junctions (Fig. 4B-C). Through all  
179 stages observed, the strongest linear OsGSL5 signals were always observed at optically  
180 sectioned edges of PMCs (open arrowheads in Fig. 4), suggesting their association with the  
181 plasma membrane, well consistent to the fact that OsGSL5 and its orthologs are membrane-  
182 anchored proteins containing 15 transmembrane domains (Yamaguchi et al. 2004; Shi et al.



183 2015) (Fig. S4A). This trend became more obvious at subsequent pachytene-diakinesis stages,  
184 where PMCs gradually took a spherical shape (Fig. 4D-E). During these stages, OsGSL5  
185 localization (Fig. 4D, E) was gradually corresponding to callose deposition on PMC surfaces  
186 (Figs. 3E-F, 4D-E). The OsGSL5 signal was at undetectable level in *osgs15* mutant anthers  
187 (Fig. S9).

188 These results strongly support that OsGSL5 takes part in callose biosynthesis during  
189 meiosis stages, and taken together with RT-qPCR results, reconfirm that the *osgs15* mutations  
190 are null alleles.

191

192 **OsGSL5 impacts on male meiosis progression and chromosome behaviours:** The  
193 chromosome behaviour was assessed at respective meiotic stages determined by both anther  
194 lengths and chromosomal morphologies on plastic-embedded sections. In WT, PMCs began  
195 meiotic chromosome condensation and displayed thin thread-like appearance by leptotene  
196 (Fig. 5A-C). Chromosomes were further condensed during zygotene (Fig. 5D), at which  
197 homologous chromosomes begin to be synapsed. At pachytene when synapsis is completed,  
198 PMCs displayed thick-threads of homologous pairs (Fig. 5E, E'). Bivalent chromosomes were  
199 further condensed through diplotene and diakinesis (Fig. 5F, G), and either of homologous  
200 pair was delivered to opposite poles during meta/anaphase I, and eventually to either cell of  
201 the dyad (Fig. 5H). In both *gs15-2* and *gs15-3* anthers, a conspicuous abnormality on male  
202 meiotic chromosomes emerged during prophase I (Fig. 5I-O), in which two different types of  
203 PMCs were contained together within a same anther - one type carrying meiotic  
204 chromosomes with seemingly normal appearance, named wildtype-like PMC (wl-PMC) (Fig.  
205 5L, M, M'\_wl), and another displaying aberrant behaviors of meiotic chromosomes, such as  
206 tight aggregations and impaired homologous pairings, named aberrant PMC (ab-PMC) (Fig.

207 5L-O, M'\_ab). The chromosome spreading method further enabled to clarify the abnormality  
208 in *osgs15* ab-PMCs (Fig. S10).

209 In above observations, we noticed the *osgs15* mutation somewhat affected time-course  
210 progression of male meiosis, in addition to segregation of two PMC types. Thus, to make the  
211 *osgs15* impact on meiosis progression clearer, the frequency of each meiosis stage observed  
212 in PMCs was plotted along anther lengths. In 0.4- to 0.8-mm *osgs15* anthers, ab-PMCs  
213 appeared irregularly in range of 8.2-46.2% of all PMCs observed (Fig. 6A, Table S3).  
214 Another point of interest was a precocious initiation of several meiotic stages in not all, but a  
215 part of wl-PMCs, compared to WT PMCs. Interestingly, despite a subset of wl-PMCs  
216 displaying chromosomal features particularly of zygotene to dyad were observed earlier than  
217 WT PMC stages (asterisks in Fig. 6A), male meiosis was completed similarly in 0.9mm  
218 anthers of both WT and *osgs15* plants (Fig. 6A, Table S3).

219 In 0.4-0.5mm *gs15* anthers, >85% of ab-PMCs retained chromosomal aggregates, and  
220 concomitantly appeared with diplotene/diakinesis-like wl-PMCs (Figs. 6B, S10, Table S3). In  
221 0.6-0.7mm *gs15* anthers, about >27% of ab-PMCs had more condensed univalents and/or  
222 multivalents in addition to normal bivalents, concomitant with wl-PMCs retaining  
223 diplotene/diakinesis- or meta/telophase I-like chromosomes (Figs. 6B, S10, Table S3). In 0.7-  
224 0.8mm anthers, >80% ab-PMCs again displayed less-condensed aggregated chromosomes  
225 concomitantly with diplotene/diakinesis-like wl-PMCs (Figs. 6B, S10, Table S3). The reason  
226 was ambiguous, but it may suggest that aberrant aggregations of chromosomes at early  
227 prophase I resulted in uni/multivalent formation at later stages, and that ab-PMCs retaining  
228 uni/multivalents were abortive and undetected during late prophase I.

229

230 ***osgs15* mutation caused precocious initiation of male meiosis:** An earlier occurrence of  
231 meiotic prophase-I stages frequent in *osgs15* anthers (Fig. 6) raises a possibility that it is

232 attributable to defects in premeiotic events. To test this hypothesis, we performed PAIR2  
233 immunostaining. Rice PAIR2 promotes homologous chromosome synapsis, and its  
234 accumulation within the nucleus is reported to initiate during premeiotic interphase, just as  
235 following the initiation of premeiotic DNA replication (Nonomura et al. 2006). Furthermore,  
236 the transcriptional level of *PAIR2* gene was unaffected by *osgs15* mutation through all meiotic  
237 stages (Fig. S11). Thus, PAIR2 can be used as a maker to infer the timing of replication  
238 initiation in anthers at premeiotic interphase.

239 PAIR2 nuclear signals were classified into three classes by their intensity; absent (class I),  
240 faint (class II) and strong (class III) (Fig. 7A), of which the class II was supposed to be a  
241 stage following premeiotic replication initiation. In WT 0.30-0.45mm anthers observed, 80%  
242 of PMCs showed no PAIR2 signal (class I), suggesting the cells being at mitotic SPC stage or  
243 before replication, and only 20% showed class II signals. In contrast, in anthers with the same  
244 lengths, around 60-70% of *osgs15* PMCs showed either class II or III signals (Fig. 7B, C).  
245 These results clearly indicate that OsGSL5 has an impact on timely initiation of premeiotic  
246 events, such as PAIR2 loading that contemporises with DNA synthesis during premeiotic  
247 interphase.

248

249 ***osgs15* mutation disrupts homologous synapsis:** Next, we asked whether key meiotic events  
250 such as homologous chromosome synapsis was affected in *osgs15* PMCs or not. PAIR2 was  
251 normally loaded on meiotic chromosomes normally in both WT PMCs (n=168) and *osgs15-2*  
252 PMCs observed (n=134) (Fig. 8A), which further ensured that premeiotic accumulation of  
253 PAIR2 in PMC nuclei occurs normally even in *gs15* mutants (Fig. 7). In contrast, loading of  
254 ZEP1, which is a transverse filament component of synaptonemal complex and governs  
255 meiotic crossover numbers in rice (Wang et al. 2010), was severely diminished in all *osgs15-2*  
256 PMCs at zygotene and pachytene (n=85), while it was constantly observed in all WT PMCs

257 in same stages (n=92) (Fig. 8B) and the *ZEP1* gene expression was comparable between WT  
258 and *osgs15-2* anthers (Fig. S11). Though a chromosomal aggregate characteristic of ab-PMCs  
259 was hard to be distinguished at these stages, the result suggests that failed ZEP1 loading took  
260 place in both wl- and ab-PMCs in *osgs15* anthers.

261 Telomere bouquet is a chromosomal arrangement important for meiotic homologous  
262 pairing and synapsis in many eukaryotes including rice (Zhang et al. 2017). In anthers around  
263 leptotene and zygotene, only 37% PMCs displayed the bouquet in *osgs15-2* mutant (n=52),  
264 while 78% did in WT (n=41) (Fig. 8C). In 0.60-0.70mm anthers, no bouquet was observed  
265 both in WT and *osgs15-2* mutant (Fig. S12), suggesting the *osgs15* mutation restricted bouquet  
266 formation, but not dissolution.

267

#### 268 **Altered transcript levels of key meiotic and callose metabolizing genes in *gs15* anthers:**

269 The transcriptional levels of 13 genes having key roles in meiosis and two genes involved in  
270 callose metabolism were quantified in meiotic anthers by RT-qPCR. Of 13 genes, *PAIR3* and  
271 *MER3* were significantly upregulated at early meiosis (0.3-0.5mm anthers), and *REC8* was  
272 upregulated significantly at mid and late meiotic stages (0.6-1.1mm anthers) in *osgs15-2*  
273 anthers (Fig. S11). The transcript levels of other 10 meiotic genes were comparable between  
274 WT and *osgs15* (Fig S11).

275 Noteworthy, two callose metabolizing genes, *Osg1* gene encoding a tapetum-specific  $\beta$ -  
276 1,3-glucanase (Wan et al. 2011) and *UGPI* gene encoding an UDP-glucose phosphorylase  
277 involved in biosynthesis of cell wall components including callose (Chen et al. 2007), were  
278 both downregulated in *osgs15-2* anthers through all meiotic stages (Fig. 9).

279

280

## 281 **Discussion**

### 282 **OsGSL5-dependent callose accumulation in rice anthers during meiosis**

283 This study gained important insights into OsGSL5 callose synthase responsible for callose  
284 deposition at extracellular spaces of anther locules during premeiotic and meiotic stages (Fig.  
285 3). Double immunostaining of OsGSL5 and callose revealed that subcellular OsGSL5  
286 localizations are restricted on PMC plasma membrane facing to PMC-PMC junction, where  
287 multiple PMCs meet with each other along the central axis of anther locules, and served  
288 callose polysaccharides to extracellular spaces of PMC-PMC junctions through premeiotic  
289 interphase and early prophase I (Fig. 4A-D). Another important point is that during  
290 premeiosis, callose deposition was observed at PMC-TC interfaces in addition to PMC-PMC  
291 junctions, whereas OsGSL5 localization was limited to PMC-PMC (Fig. 4A). Given that  
292 callose accumulation begins at PMC-PMC junctions, but not at PMC-TC interphases (Fig.  
293 S8), callose synthesized at PMC-PMC junction is likely supplied for fulfilling PMC-TC  
294 interfaces during premeiotic interphase, further affirming PMC-PMC junctions as a callose-  
295 producing center.

296 Fluctuation in callose levels, as above mentioned, generally involves two counteracting  
297 enzymatic activities:  $\beta$ -1,3-glucan synthases and hydrolases (Frankel et al. 1969; Stieglitz and  
298 Stern, 1973). A rice  $\beta$ -1,3-glucanase, *Osg1*, functions in timely callose degradation on pollen  
299 grains and impact on pollen fertility (Yamaguchi et al. 2002; Wan et al. 2011), and *Osg1*  
300 gene expression was reduced in *osgs15* mutant (Fig. 9), likely suggesting a positive feedback  
301 regulation of *Osg1* transcription by elevated callose levels to maintain callose homeostasis in  
302 anthers. Rice *UGPI* is a UDP-glucose pyrophosphorylase that catalyzes production of UDP-  
303 glucose, a substrate of glucan synthases, including GSL5. In *UGPI* RNAi plants, callose  
304 accumulation in anther was significantly diminished during both meiotic and post-meiotic  
305 stages (Chen et al. 2007) which is consistent with our results (Fig. 3). Thus, it is possible that

306 UDP-glucose catalyzed by *UGP1* is used for *GSL5*-dependent callose synthesis, leading to  
307 callose accumulation during meiosis and post-meiosis, and *Osg1* probably acts in callose  
308 fluctuation antagonistically to the UGP1-GSL5 pathway.

309

### 310 **Impact of callose accumulation on male meiosis initiation**

311 A key insight gained with this study is the impact of OsGSL5 on male meiosis initiation and  
312 progression (Figs. 6, 7). In addition to defects in meiosis time-course, *osgsl5* mutant included  
313 ab-PMCs that exhibited several other defects in chromosome behaviour and condensation,  
314 homologous synapses and reduced bouquet structures, along with wl-PMCs that exhibited a  
315 normal appearance of meiotic chromosomes (Figs. 5, 8, S10). Even if a part of *osgsl5* PMCs  
316 passed through meiosis, callose deposition is defective also on all surviving tetrad spores (Fig.  
317 3T), resulting in male sterility as previously reported (Shi et al. 2015).

318 Shi et al. (2015) concluded that OsGSL5 is responsible for callose accumulation at post  
319 meiosis stages, but not during early meiosis. However, this conclusion was led only by a  
320 snapshot of whole-mount staining of anthers with aniline blue, but not of sectioning, perhaps  
321 resulting in an oversight of OsGSL5 impact during premeiotic interphase and prophase I  
322 stages. Similarly, a frequent appearance of survival spores, probably derived from wl-PMCs,  
323 may explain the reason why the impact of callose function during male meiosis was  
324 underestimated in previous studies using mutant plants lacking callose synthesis.

325 Microscopic observations of *osgsl5* mutant PMCs implicated that wl-PMCs with meiotic  
326 chromosomes lacked ZEP1 loading (Fig. 8B), but achieved seemingly normal bivalent  
327 formation and disjunction of homologous pairs in meiosis I (Fig. S10F, I). It is not surprised,  
328 because in rice *zep1* mutants, bivalents were formed at the normal level and a considerable  
329 number of tetrads were formed, while the viability of gametes significantly reduced probably  
330 due to aberrant chromosomal condensation in microspores (Wang et al. 2010). Rather, it is a

331 wonder why meiotic chromosomes of *osgsl5* wl-PMCs lose the capacity for ZEP1 loading.  
332 Furthermore, frequent appearance of ab-PMCs is difficult to be explained only by the loss of  
333 ZEP1, because of no appearance of such aggregates reported in *zep1* mutants (Wang et al.  
334 2010). A similar loss of ZEP1 loading is observed in *mel2* mutant PMCs (Nonomura et al.  
335 2011), in which *OsGSL5* expression is significantly reduced (Fig. S1). Furthermore, PMCs at  
336 various cell cycle stages segregated in a same *mel2* anther, due to asynchronous initiation of  
337 DNA replication (Nonomura et al. 2011). This observation may account for appearance of  
338 two different PMC types in *gsl5* anthers (Figs. 5, 6), taking place together with precocious  
339 male-meiosis entry (Fig. 7). Rice LEPTOTENE1 (LEPTO1), a type-B response regulator that  
340 participates in establishing key features of meiotic leptotene chromosomes. In *lepto1* mutant  
341 anthers, expression levels of both *OsGSL5* and *UGP1* genes were reduced significantly and  
342 callose depleted during meiosis (Zhao et al. 2018). Interestingly, the loading of important  
343 meiotic chromosome elements, such as OsREC8, OsAM1 and ZEP1, was also defected in  
344 *lepto1* (Zhao et al. 2018). The past observations and findings of this study together strongly  
345 implicate that callose filling the extracellular spaces of anther locules is an important step for  
346 proper PMC differentiation and/or male meiosis initiation, while the underlying mechanisms  
347 have been remained elusive.

348 Recent studies often suggest the role of callose accumulation in male meiosis via cross-  
349 talking among anther locular cells (Plackett et al. 2014; Zhai et al. 2015; Liu et al. 2017;  
350 Huang et al. 2019; Lei and Liu 2020). PMCs are interconnected with each other and with  
351 surrounding TCs through PD or cytoplasmic channels at early meiosis (Heslop-Harrison, 1964;  
352 Mamun et al. 2005; Mursalimov et al. 2010; Mursalimov et al. 2013). However, during  
353 transition to meiosis, such intercellular connections are solved/blocked probably by hyper  
354 callose accumulation (Sager and Lee, 2018), probably by hyper accumulation of callose in  
355 anther locules. In addition to controlling symplastic pathway, callose accumulation is thought

356 to function as a molecular filter for signalling from TCs to PMCs via apoplastic pathway  
357 (Clement & Audran, 1995; Roschttardt et al. 2013). Biochemical evidence further suggest  
358 that callose deposition can alter permeability and plasticity of cell walls in coexistence with  
359 cell-wall components like cellulose (Abou-Saleh et al. 2018). The above findings imply that  
360 hyper callose accumulation has a potential to bring dramatic microenvironmental changes to  
361 its surrounding PMCs via controlling symplastic or apoplastic pathways or both, which  
362 entails to be confirmed in future studies.

363

364 In summary, this study demonstrates that *GSL5*-dependent callose deposition during  
365 meiosis is crucial for proper timing of meiosis initiation and subsequent progression, and  
366 upon callose depletion at this point of time perturbs normal meiosis onset and consequently  
367 pose severe impact on several meiotic events. This study sheds light on the importance of  
368 callose in meiosis of higher plants which is an important progress in the field of plant  
369 reproductive biology, and is a first step towards understanding the mechanistic basis of *GSL5*  
370 and callose function in meiosis initiation.

371

## 372 **Materials and Methods**

373 **Plant materials and growth conditions:** For target mutagenesis of *OsGSL5* gene  
374 (*Os06g0182300*), potential CRISPR guide-RNA sequences were designed using CRISPR-P  
375 v2.0 software (Liu et al. 2017). Double stranded DNAs were produced from oligo DNA pairs  
376 of gRNAF1/gRNAR1 and gRNAF2/gRNAR2 for *osgsl5-2* and *osgsl5-3* (Table S2),  
377 respectively, by annealing. After cloning into pU6 vector, the *pU6* promoter-fused double-  
378 stranded DNA was transferred to pZD shuttle vector (Mikami et al. 2015), and introduced  
379 into seed-derived calli of *japonica* rice cultivar Nipponbare by the method previously



380 reported (Hiei et al. 1994). All plants were grown in growth chambers at 30°C day and 25°C  
381 night temperature and 70% relative humidity with a daylength of 12 hours.

382

383 **Pollen and seed fertility tests:** For pollen fertility, anthers extracted from fixed panicles with  
384 Carnoy's fluid were squashed in I<sub>2</sub>-KI solution, and viable pollen grains stained were counted  
385 under the light microscope BX50 (Olympus). For seed fertility, the ratio of fertile spikelet  
386 numbers was counted in each of five panicles and averaged.

387

388 **Cytological observations:** For observations of chromosome behaviours and callose  
389 deposition on anther sections, anthers were fixed in 4% paraformaldehyde (PFA)/1xPBS.  
390 After removal of lemma and palea of florets, anthers were dehydrated in ethanol graded  
391 series for 30-60 min each, followed by infiltration in embedder with hardener1 of Technovit  
392 7100 (Kulzer Technique), overnight on rotor at 4°C. The solution was replaced with fresh  
393 Technovit with hardener1 every 6 hours and incubated overnight with on rotor at 4°C. Then,  
394 anthers were transferred to a cryo-dish with Technovit polymerised by addition of hardener2  
395 and placed at 50-60°C for hardening. Plastic embedded sections with 4-6µm thickness were  
396 taken using the microtome R2255 (Leica), and air dried at room temperature. The section was  
397 stained for 25-30 min with 0.01% aniline blue (Sigma Aldrich) in 0.1M K<sub>3</sub>PO<sub>4</sub> (pH 12) for  
398 callose, or with a drop of 1.5µg/mL 4',6-diamidino-2-phenylindole (DAPI)/Vector shield  
399 (Vectorlabs) for chromosome observation. The images were captured under the confocal  
400 laser scanning microscope system FV300 (Olympus), and processed with ImageJ  
401 (<https://imagej.nih.gov/ij/docs/intro.html>).

402 For chromosomal spreads, whole panicles were fixed in Carnoy's fluid and stored at 4°C  
403 until use. Fixed anthers incubated with 0.1% FeCl<sub>2</sub> overnight were squashed in acetocarmine  
404 solution (1% (w/v) carmine (Merk)/45% acetic acid) with forceps on a clean glass slide. After

405 quick removal of anther-wall remnants, a suspension of released PMCs was covered with a  
406 cover slip, and gently heat-treated followed by gentle thumb compression. The images of  
407 chromosomal spreads were captured under the light microscope BX50 with DP2-SAL CCD  
408 camera system (Olympus). The number of PMCs each classified by certain phenotypes in  
409 chromosome behaviours was counted and used for quantification together with those  
410 observed in plastic-embedded sections.

411

412 **RT-qPCR:** To quantify the transcript levels of rice genes, anthers and tissues were collected,  
413 immediately frozen in liquid nitrogen in a 2mL tube with 2mm beads, and homogenized on  
414 automated shaker BMS-A20TP (Bio Medical Science) at 1100rpm for 2min. RNAs were  
415 extracted by TRIZOL RNA extraction kit method according to manufacturer's instruction  
416 (Invitrogen) and supplied to Super Script III First-Strand synthesis system (Invitrogen) for  
417 cDNA library construction. RT-qPCR was performed using Real Time System TP800  
418 (TAKARA bio systems), according to manufacturer's instruction. All primer sequences used  
419 for RT-qPCR were shown in Table S2. *Rice Actin1 (RAc1)* gene was used as an internal  
420 control to normalize the expression levels at all meiosis stages quantified.

421

422 **Antibody production:** To produce an antibody specific for OsGSL5 of 1910 amino acids  
423 (aa), the cDNA sequence encoding 1009-1260 aa position was amplified using the above  
424 cDNA library as a template (Fig. S4, Table S2), and cloned into pDEST17 vectors  
425 (Invitrogen). The His-tagged protein expressed in *E. coli* strain BL21-AI (Invitrogen) was  
426 purified using Ni-NTA agarose resin (FUJIFILM), and immunised to rabbits and guinea pig.

427 To observe telomere behaviours in PMCs, the antibody was raised against rice  
428 PROTECTION OF TELOMERE1 (OsPOT1), which is encoded by a single gene locus

429 *Os04g0467800* (*LOC\_Os04g39280.1*), while Arabidopsis genome has two paralogous loci,  
430 *POT1a* and *POT1b* ([Shakirov et al. 2005](#)). Procedures to raise antisera are same as above.

431

432 **Immunofluorescent staining of PMCs and tissue sections:** Young rice panicles were fixed  
433 with 4%PFA/1xPMEG (25mM PIPES, 5mM EGTA, 2.5mM MgSO<sub>4</sub>, 4% glycerol, and 0.2%  
434 DMSO, pH 6.8), followed by washing 6 times with 1xPMEG, and stored at 4°C until use  
435 ([Nonomura et al. 2006](#)). For immunofluorescence of PMCs, fixed anthers were treated with  
436 the enzyme cocktail of 2% cellulase Onozuka-RS (Yakult)/0.3% pectolyase Y-23/0.5%  
437 macerozyme-R10 (FUJIFILM Wako)/0.375% Cytohelicase (Sigma-Aldrich) in 1xPME  
438 (same with 1xPMEG except for excluding glycerol) for permeabilization on MAS-coating  
439 glass slide MAS-02 (Matsunami Glass), squashed by forceps and used for immunostaining,  
440 as described in [Nonomura et al. \(2006\)](#).

441 Immunostaining of anther sections was done as described by [Tsuda and Chuck \(2019\)](#) with  
442 minor modifications. Briefly, anthers were dehydrated in ethanol graded series and Histo-  
443 Clear (Cosmo bio co. Ltd), embedded into Paraplast paraffin wax (McCormick Scientific).  
444 Paraffin blocks containing anther samples were trimmed and stored at 4°C until use. The  
445 blocks were sectioned into 8-10µm thickness by the microtome. Dewaxed and rehydrated  
446 samples were incubated with primary antibodies. The rabbit anti-OsGSL5, the rabbit anti-  
447 OsPOT1 (this study), the rabbit anti-PAIR2 ([Nonomura et al. 2006](#)) and rat anti-ZEP1  
448 antibodies ([Nonomura et al. 2011](#)) were diluted to 1/100, 1/3000, 1/3000 and 1/1000,  
449 respectively, with 3%BSA/1xPMEG and used as primary antibodies. For callose  
450 immunostaining, monoclonal antibody specific to β-1,3-glucan (callose) ([Biosupplies](#)  
451 [Australia](#)) was diluted to 1/1000 and used as a primary antibody was used.

452 In both squash and sectioning methods, secondary antibodies Alexa fluor 488 (Abcam) and  
453 Cy3-conjugated IgG (Merck) of 1/200 dilution was used for detection. Immunofluorescent

454 images were captured by Fluoview FV300 CSLM system (Olympus) and processed with  
455 ImageJ.

456

#### 457 **Acknowledgments**

458 We thank Dr. Norio Komeda (NIG, SOKENDAI) for helping the production of anti-OsPOT1  
459 antisera, and Dr. Yoshihisa Oda (NIG) for reading manuscript and giving useful comments.

460 The *mel2* mutant used in this study was provided by NIG with support from National  
461 BioResource Project (NBRP) Rice, AMED, Japan. This work was partly supported by JSPS  
462 KAKENHI Grant No. 21H04729 and 18H02181 (to K.I.N), and Bilateral Programs Grant No.  
463 JPJSBP120213510 (to K.I.N). We also thank MEXT (The Ministry of Education, Culture,  
464 Sports, Science and Technology, Govt. of Japan) for the support.

465

#### 466 **Author contributions:**

467 H.S, M.M and K.I.N have designed the research work. H.S carried out most of the  
468 experiments. K.T has helped in the production of antibody against GSL5. M.M has guided in  
469 immunostaining experiments. H.S and K.I.N wrote the manuscript. M.M and K.T helped in  
470 drafting the manuscript.

471

#### 472 **Data Availability:**

473 The data presented in this study are available from the corresponding author upon reasonable  
474 request.

475

#### 476 **Figure legends:**

477 **Figure 1. Schematic illustration of anther development and callose accumulation during**  
478 **male meiosis progression.** A: Illustration of a cross section of premeiotic anther with four  
479 locules. B: Enlarged view of anther locules with constituent cell types, respective anther

480 lengths and their cell cycle status. The red regions in each locule correspond to areas for  
481 callose deposition at extracellular spaces observed in this study.

482

483 **Figure 2. The *osgs15* mutant phenotype and *OsGSL5* gene expression.** A: Nucleotides  
484 deletion and insertion sites in *osgs15-2* and *osgs15-3* knock-out mutants. B: The vegetative  
485 plant growth was comparable between wild type and *osgs15-2*. C: Images of panicles at seed  
486 filling stage of wild type and *osgs15-2* (left), and the graph showing seed setting rate of wild  
487 type, *osgs15-2* and *osgs15-3* (right). D: Pollen viability test by KI<sub>2</sub> staining of WT (left),  
488 *osgs15-2* (middle) and *osgs15-3* (right). Darkly and faintly stained grains were categorized as  
489 viable and nonviable pollen, respectively. Bar=40µm. E: The relative expression levels of  
490 *OsGSL5* transcripts in WT and *osgs15-2* anthers by RT-qPCR. Errors bars each indicate the  
491 standard deviation of the mean of 3 biological replicates. The n value in parentheses is the  
492 number of florets used in each replicate. Asterisks indicate significant differences (P<0.05)  
493 between WT and *osgs15-2* (student's t-test).

494

495 **Figure 3. Callose accumulation during male meiosis in WT and *osgs15-2* anthers.** Callose  
496 accumulation pattern was monitored by aniline blue staining at different male meiosis  
497 substages. A and K: Mitotic SPC stage, B and L: Premeiotic interphase, C and M: Leptotene,  
498 D and N: Zygotene, E and O: Pachytene, F and P: Diplotene, G and Q: Diakinesis, H and R:  
499 Dyad, I and S: Tetrad, J and T: Microspore. An arrowhead in the inset in B indicates the cell  
500 wall unstained with aniline blue. Bar=20µm.

501

502 **Figure 4. Co-immunostaining of callose and OsGSL5 protein in WT anthers.** A:  
503 Premeiotic interphase, B: Leptotene, C: Zygotene, D: Pachytene, E: Diplotene-Diakinesis.  
504 Bar=20µm. In panel A, white arrows show the region retaining callose deposition (red), but  
505 lacking OsGSL5 localization (green), at PMC-TC interface. The closed and open arrowheads  
506 indicate unstained cell-wall regions and linearly aligned OsGSL5 signals on PMC plasma  
507 membranes, respectively.

508

509 **Figure 5. Dynamics of chromosomal behaviour in WT and *osgs15-2* anthers.** Plastic-  
510 embedded anthers cross sections stained with DAPI for chromosomes observation. A and I:  
511 Mitosis, B and J: Interphase, C and K: Leptotene, D and L: Zygotene, E and M: Pachytene, F  
512 and N: Diplotene, G and O: Diakinesis, H and P: Dyad. Bar=20µm. Note that *osgs15-2*  
513 mutant anthers contained two types PMCs with respect to chromosome appearance (wl-PMC  
514 and ab-PMC, see the text). The insets in each panel are magnified views of nuclei enclosed  
515 with dashed squares, in which white and red squares indicate nuclei of wl-PMCs and ab-  
516 PMCs, respectively. The insets in panels E and M are further magnified and shown in E', M'  
517 and M'2, as examples of WT PMC, wl-PMC and ab-PMC.

518

519 **Figure 6. Male meiosis progression and ab-PMC appearance in WT and *osgs15* anthers.**  
520 A: Frequency of PMC stages observed with respect to anther lengths in WT and *osgs15*  
521 mutants, in which the frequency of ab-PMCs in *osgs15* anthers was shown as gray bars. The  
522 number at the top of each bar indicates the absolute number of cells counted. The wl-PMC  
523 stages marked with asterisks indicate that those stages emerged much earlier than comparable  
524 stages observed in WT anthers. B: Each half-donut graph indicates frequency of three  
525 different classes for aberrant chromosomal morphologies and behaviors in *osgs15-2* or *osgs15-3*  
526 ab-PMCs observed along respective anther lengths. Colored outer rims on a half donut  
527 indicate meiotic stages of wl-PMCs that concomitantly emerge with respective classes of ab-  
528 PMCs. Definition of outer rim colors is consistent to that in A. The number in parentheses  
529 represents the absolute number of cells counted.

530

531 **Figure 7. Precocious accumulation of PAIR2 in *osgsl5* PMC nuclei.** A: Immunostaining of  
532 PAIR2 in isolated premeiotic PMCs. The degree of PAIR2 accumulation in the PMC nucleus  
533 was categorized into three classes based on the immunofluorescent intensity. Bar=2.5µm. B:  
534 The rate of three PAIR2 classes in each of WT, *osgsl5-2* and *osgsl5-3* premeiotic anthers. C:  
535 Immunostaining of PAIR2 on longitudinal premeiotic anther sections with anti-PAIR2  
536 antibody. Bar= 50µm.

537

538 **Figure 8. ZEP1 loading to and bouquet frequency of meiotic chromosomes affected, but**  
539 **PAIR2 loading unaffected in *osgsl5* anthers.** A: Immunostaining of ZEP1 in WT (n=92)  
540 and *osgsl5-2* (n=92). ZEP1 loading onto chromosomes was inhibited in *osgsl5* mutant. B:  
541 Immunostaining of PAIR2 in WT (n=168) and *osgsl5-2* (n=134). PAIR2 loading is unaffected  
542 in *osgsl5* mutant. C: Bouquet structures visualized by immunostaining of telomere specific  
543 OsPOT1 during leptotene-zygotene transition (0.50-0.55mm anther) in PMCs of WT (n=41)  
544 and *osgsl5-2* (n=52). Bar=5µm.

545

546 **Figure 9. Reduced expression of rice *Osg1* and *UGP1* genes in *osgsl5-2* anthers.**  
547 Relative expression levels of callose metabolizing genes, *Osg1* and *UGP1*, in WT and *osgsl5-*  
548 *2* anthers by RT-qPCR. Errors bars indicate standard deviations of means of three biological  
549 replicates. Asterisks indicate significant differences (P<0.05) between WT and *osgsl5-2*  
550 (student's t-test).

551

552 **Supporting figure 1. Transcript levels of *OsGSL5* gene quantified by RT-qPCR in WT**  
553 **and *mel2* anthers.**

554

555 **Supporting figure 2. Callose accumulation in WT and *mel2* anthers.**

556

557 **Supporting figure 3. Expression profile of *OsGSL5* gene at various tissue developmental**  
558 **stages in WT rice plants.**

559

560 **Supporting figure 4. *OsGSL5* protein structure.**

561

562 **Supporting figure 5. Pollen viability in WT and *osgsl5* mutant.**

563

564 **Supporting figure 6. The expression level of *OsGSL5* transcripts in various vegetative**  
565 **tissues including male and female organs in WT and *osgsl5-2* plants.**

566

567 **Supporting figure 7. Anther development is unaffected in *osgsl5* mutants.**

568

569 **Supporting figure 8. Callose deposition at its beginning stage during premeiotic**  
570 **interphase in WT anthers.**

571

572 **Supporting figure 9. Immunostaining of *OsGSL5* protein.**

573

574 **Supporting figure 10. Aberrant chromosome behaviors detected in *osgsl5* mutant**  
575 **anthers by chromosome spreading technique.**

576

577 **Supporting figure 11. Transcript levels of various meiotic genes in WT and *osgsl5-2***  
578 **anthers.**

579

- 580 **Supporting figure 12. Telomere bouquet structures visualized at late prophase stage.**  
581  
582 **Supporting table 1. Oligo DNA sequences for guide RNA constructions and PCR**  
583 **primers employed in this study.**  
584  
585 **Supporting table 2. Seed fertility of WT, *osgs15-2* and *osgs15-3* plants.**  
586  
587 **Supporting table 3. PMC counting data on the basis of Figure 6 graphs.**

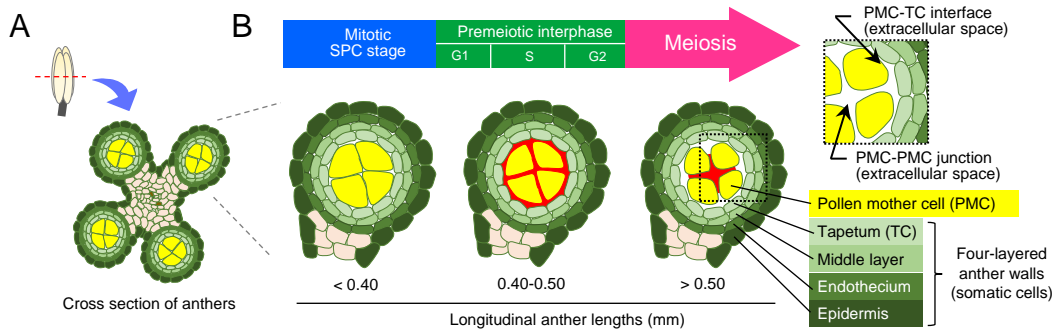

**Figure 1. Schematic illustration of anther development and callose accumulation during male meiosis progression.** A: Illustration of a cross section of premeiotic anther with four locules. B: Enlarged view of anther locules with constituent cell types, respective anther lengths and their cell cycle status. The red regions in each locule correspond to areas for callose deposition at extracellular spaces observed in this study.



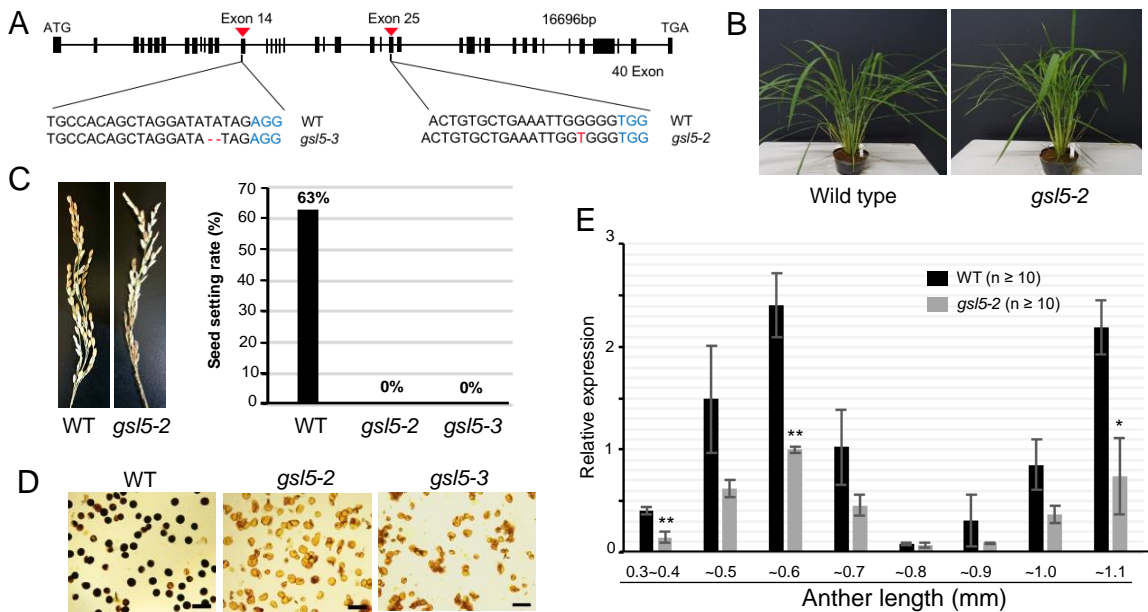

**Figure 2. The *osgsl5* mutant phenotype and *OsGSL5* gene expression.** A: Nucleotides deletion and insertion sites in *osgsl5-2* and *osgsl5-3* knock-out mutants. B: The vegetative plant growth was comparable between wild type and *osgsl5-2*. C: Images of panicles at seed filling stage of wild type and *osgsl5-2* (left), and the graph showing seed setting rate of wild type, *osgsl5-2* and *osgsl5-3* (right). D: Pollen viability test by  $KI_2$  staining of WT (left), *osgsl5-2* (middle) and *osgsl5-3* (right). Darkly and faintly stained grains were categorized as viable and nonviable pollen, respectively. Bar=40 $\mu$ m. E: The relative expression levels of *OsGSL5* transcripts in WT and *osgsl5-2* anthers by RT-qPCR. Errors bars each indicate the standard deviation of the mean of 3 biological replicates. The n value in parentheses is the number of florets used in each replicate. Asterisks indicate significant differences ( $P < 0.05$ ) between WT and *osgsl5-2* (student's t-test).

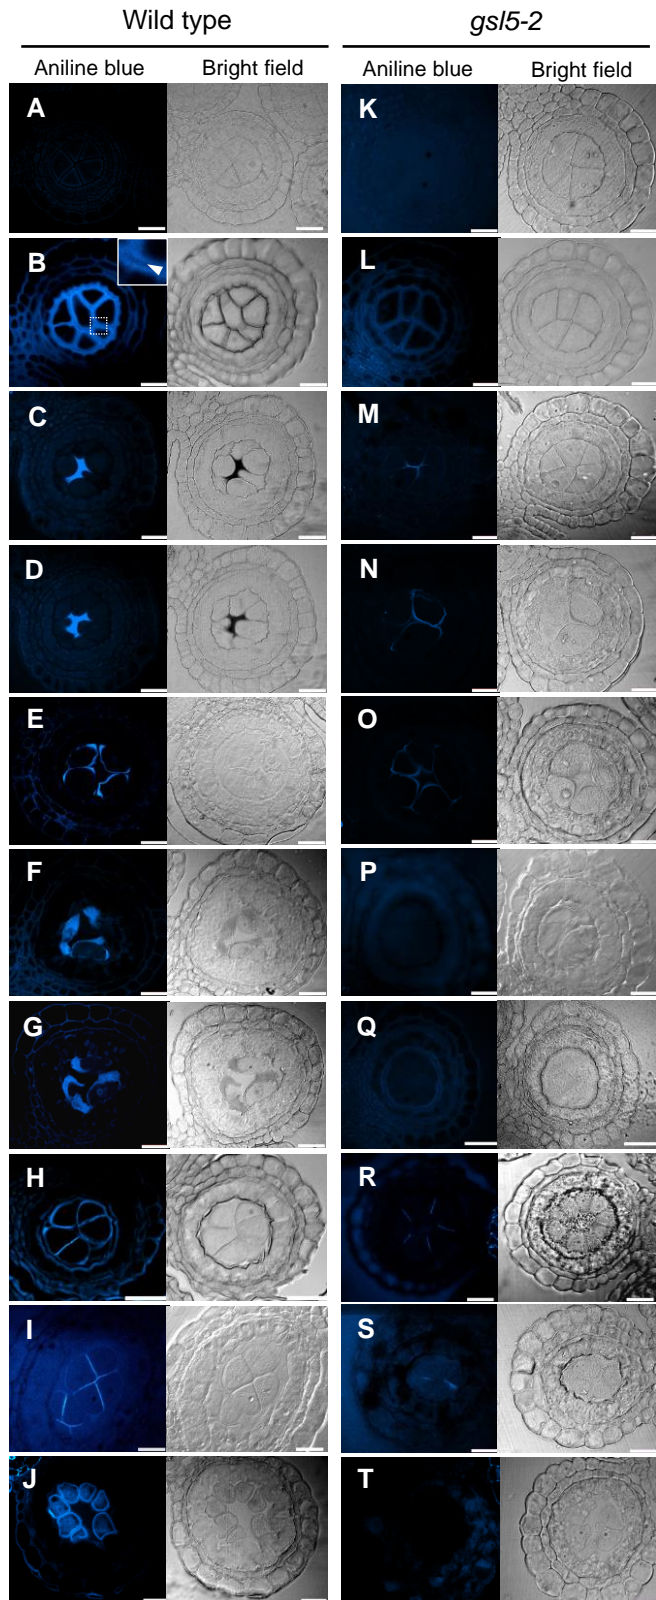

**Figure 3. Callose accumulation during male meiosis in WT and *osgs15-2* anthers.** Callose accumulation pattern was monitored by aniline blue staining at different male meiosis substages. A and K: Mitotic SPC stage, B and L: Premeiotic interphase, C and M: Leptotene, D and N: Zygotene, E and O: Pachytene, F and P: Diplotene, G and Q: Diakinesis, H and R: Dyad, I and S: Tetrad, J and T: Microspore. An arrowhead in the inset in B indicates the cell wall unstained with aniline blue. Bar=20 $\mu$ m.

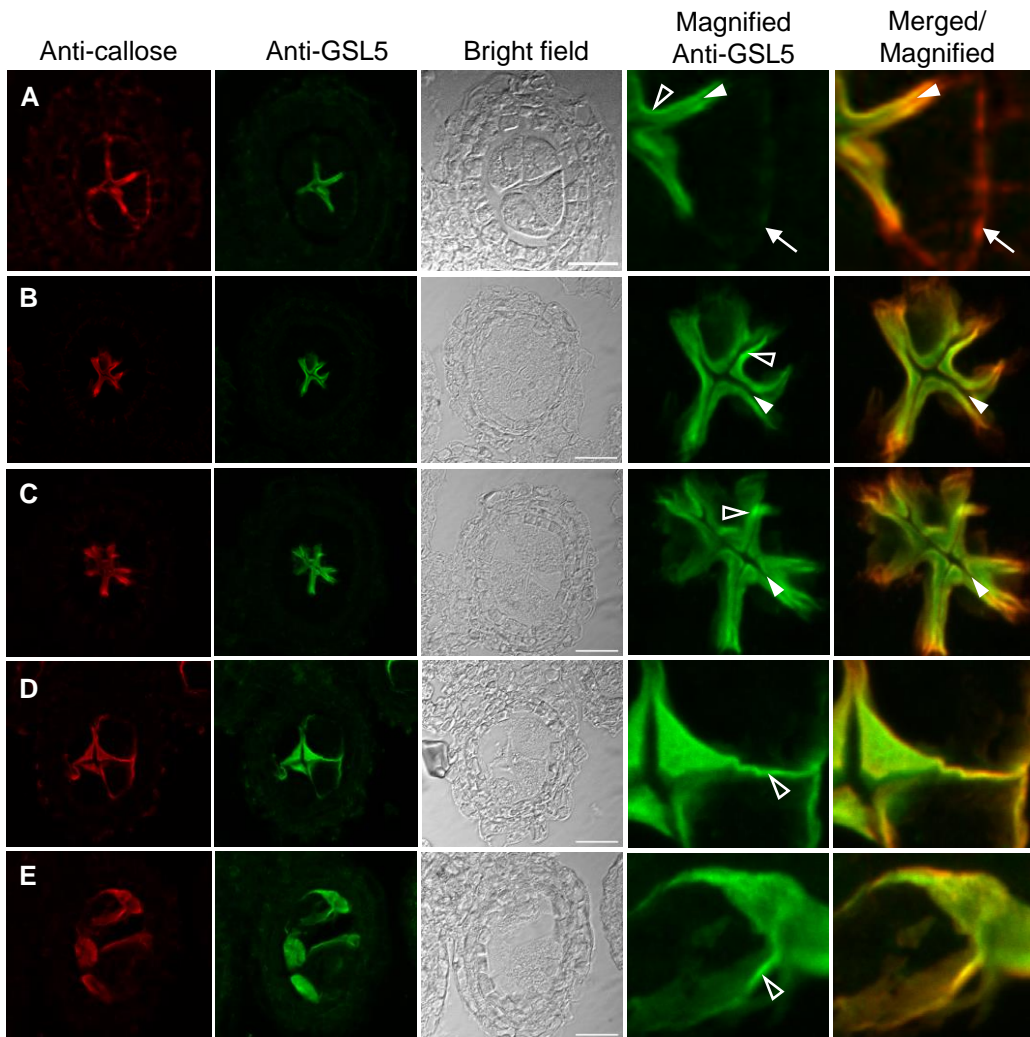

**Figure 4. Co-immunostaining of callose and OsGSL5 protein in WT anthers.** A: Premeiotic interphase, B: Leptotene, C: Zygotene, D: Pachytene, E: Diplotene-Diakinesis. Bar=20 $\mu$ m. In panel A, white arrows show the region retaining callose deposition (red), but lacking OsGSL5 localization (green), at PMC-TC interface. The closed and open arrowheads indicate unstained cell-wall regions and linearly aligned OsGSL5 signals on PMC plasma membranes, respectively.

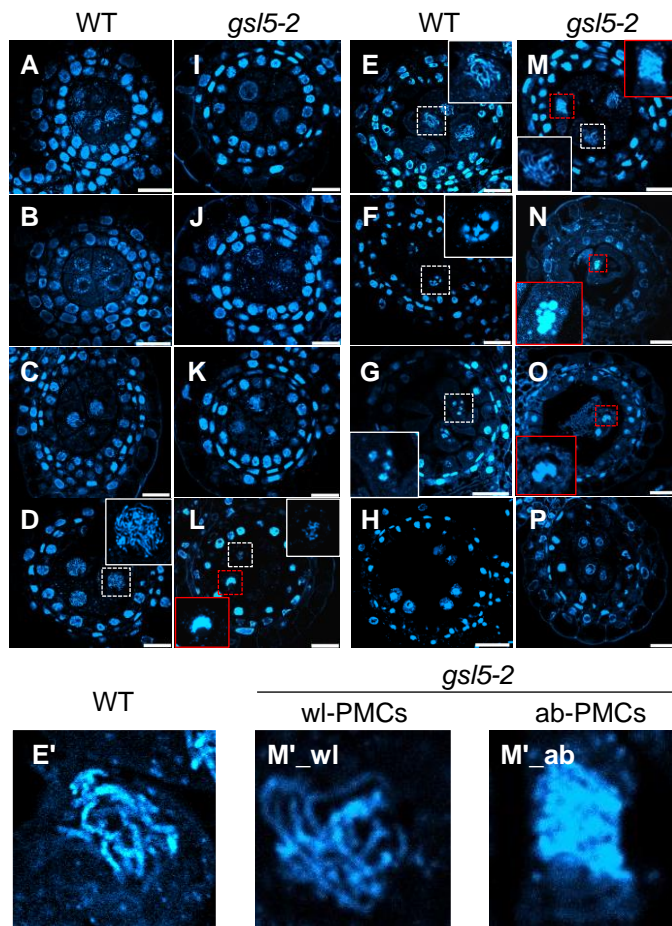

**Figure 5. Dynamics of chromosomal behaviour in WT and *osgs15-2* anthers.** Plastic-embedded anthers cross sections stained with DAPI for chromosomes observation. A and I: Mitosis, B and J: Interphase, C and K: Leptotene, D and L: Zygotene, E and M: Pachytene, F and N: Diplotene, G and O: Diakinesis, H and P: Dyad. Bar=20 $\mu$ m. Note that *osgs15-2* mutant anthers contained two types PMCs with respect to chromosome appearance (wl-PMC and ab-PMC, see the text). The insets in each panel are magnified views of nuclei enclosed with dashed squares, in which white and red squares indicate nuclei of wl-PMCs and ab-PMCs, respectively. The insets in panels E and M are further magnified and shown in E', M'1 and M'2, as examples of WT PMC, wl-PMC and ab-PMC.

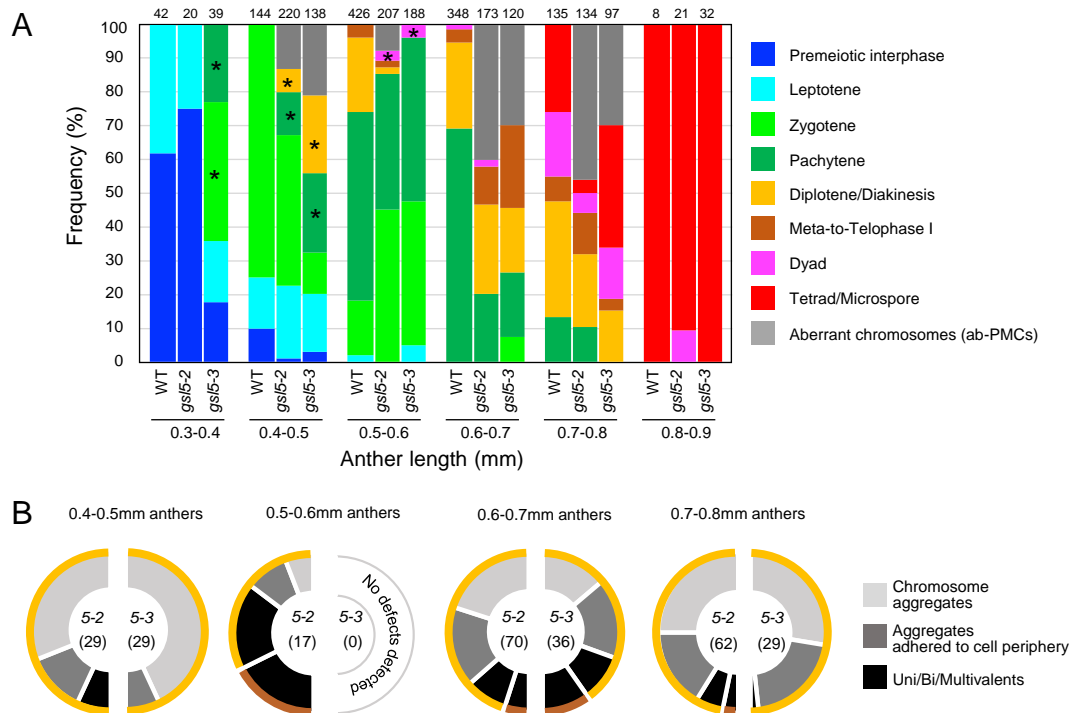

**Figure 6. Male meiosis progression and ab-PMC appearance in WT and *osgs/5* anthers.** A: Frequency of PMC stages observed with respect to anther lengths in WT and *osgs/5* mutants, in which the frequency of ab-PMCs in *osgs/5* anthers was shown as gray bars. The number at the top of each bar indicates the absolute number of cells counted. The wI-PMC stages marked with asterisks indicate that those stages emerged much earlier than comparable stages observed in WT anthers. B: Each half-donut graph indicates frequency of three different classes for aberrant chromosomal morphologies and behaviors in *osgs/5-2* or *osgs/5-3* ab-PMCs observed along respective anther lengths. Colored outer rims on a half donut indicate meiotic stages of wI-PMCs that concomitantly emerge with respective classes of ab-PMCs. Definition of outer rim colors is consistent to that in A. The number in parentheses represents the absolute number of cells counted.

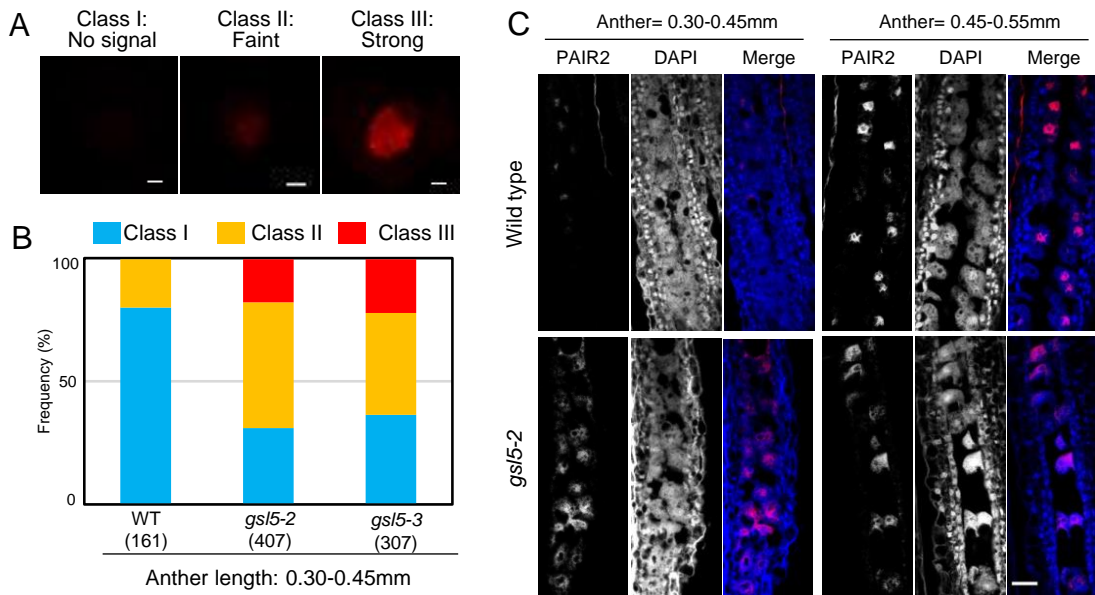

**Figure 7. Precocious accumulation of PAIR2 in *osgs15* PMC nuclei.** A: Immunostaining of PAIR2 in isolated premeiotic PMCs. The degree of PAIR2 accumulation in the PMC nucleus was categorized into three classes based on the immunofluorescent intensity. Bar=2.5 $\mu$ m. B: The rate of three PAIR2 classes in each of WT, *osgs15-2* and *osgs15-3* premeiotic anthers. C: Immunostaining of PAIR2 on longitudinal premeiotic anther sections with anti-PAIR2 antibody. Bar= 50 $\mu$ m.

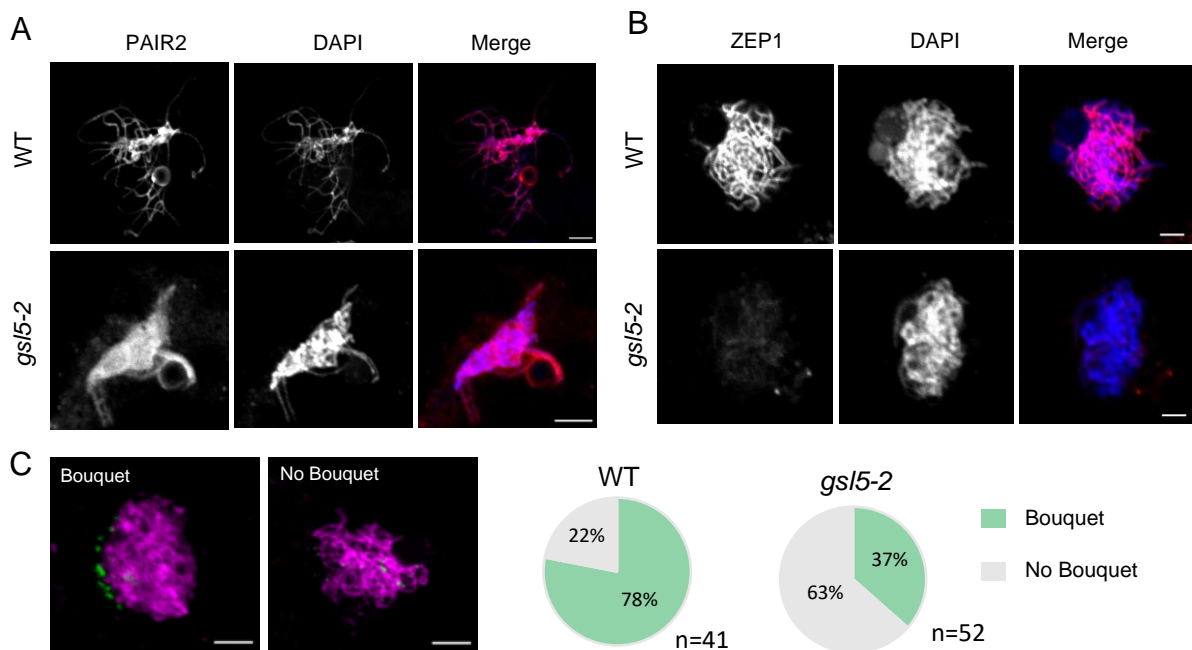

**Figure 8. ZEP1 loading to and bouquet frequency of meiotic chromosomes affected, but PAIR2 loading unaffected in *osgs15* anthers.** A: Immunostaining of ZEP1 in WT (n=92) and *ososgs15-2* (n=92). ZEP1 loading onto chromosomes was inhibited in *osgs15* mutant. B: Immunostaining of PAIR2 in WT (n=168) and *osgs15-2* (n=134). PAIR2 loading is unaffected in *osgs15* mutant. C: Bouquet structures visualized by immunostaining of telomere specific OsPOT1 during leptotene-zygotene transition (0.50-0.55mm anther) in PMCs of WT (n=41) and *osgs15-2* (n=52). Bar=5 $\mu$ m.

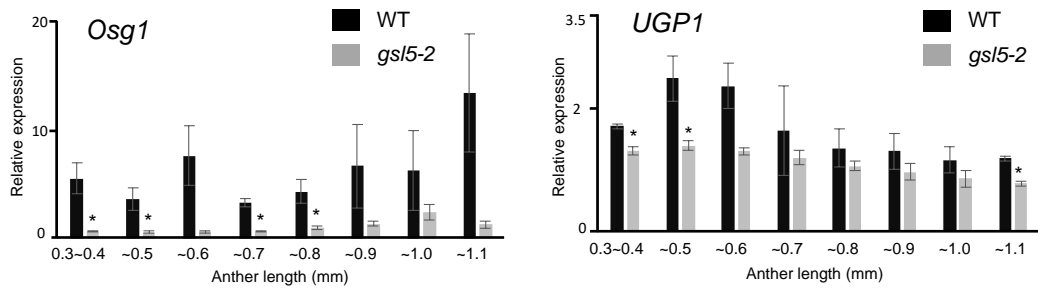

**Figure 9. Reduced expression of rice *Osg1* and *UGP1* genes in *osg15-2* anthers.** Relative expression levels of callose metabolizing genes, *Osg1* and *UGP1*, in WT and *osg15-2* anthers by RT-qPCR. Errors bars indicate standard deviations of means of three biological replicates. Asterisks indicate significant differences ( $P < 0.05$ ) between WT and *osg15-2* (student's t-test).



## Parsed Citations

Abou-Saleh RH, Hernandez-Gomez MC, Amsbury S, Paniagua C, Bourdon M, Miyashima S, Helariutta Y, Fuller M, Budtova T, Connell SD et al. 2018. Interactions between callose and cellulose revealed through the analysis of biopolymer mixtures. *Nature Communications* 9(1), 4538. <https://doi.org/10.1038/s41467-018-06820-y>

Google Scholar: [Author Only](#) [Title Only](#) [Author and Title](#)

Albert B, Ressayre A, Nadot S. 2011. Correlation between pollen aperture pattern and callose deposition in late tetrad stage in three species producing atypical pollen grains. *American journal of botany*, 98(2), 189–196. <https://doi.org/10.3732/ajb.1000195>

Google Scholar: [Author Only](#) [Title Only](#) [Author and Title](#)

Bhalla PL, Slattery HD. 1984. Callose deposits make clover seeds impermeable to water. *Annals of Botany*, 53(1), 125–128. <https://doi.org/10.1093/oxfordjournals.aob.a086661>

Google Scholar: [Author Only](#) [Title Only](#) [Author and Title](#)

Chen R, Zhao X, Shao Z, Wei Z, Wang Y, Zhu L, Zhao J, Sun M, He R, He G. 2007. Rice UDP-glucose pyrophosphorylase1 is essential for pollen callose deposition and its cosuppression results in a new type of thermosensitive genic male sterility. *The Plant cell*, 19(3), 847–861. <https://doi.org/10.1105/tpc.106.044123>

Google Scholar: [Author Only](#) [Title Only](#) [Author and Title](#)

Chen, X. Y., & Kim, J. Y. (2009). Callose synthesis in higher plants. *Plant signaling & behavior*, 4(6), 489–492. <https://doi.org/10.4161/psb.4.6.8359>

Google Scholar: [Author Only](#) [Title Only](#) [Author and Title](#)

Clement C, Audran JC. 1995. Anther wall layers control pollen sugar nutrition in *Lilium*. *Protoplasma*, 187(1–4), 172–181. <https://doi.org/10.1007/BF01280246>

Google Scholar: [Author Only](#) [Title Only](#) [Author and Title](#)

Dickinson HG, Bell PR. 1976. The changes in the tapetum of *pinus banksiana* accompanying formation and maturation of the pollen. *Annals of Botany*, 40(5), 1101–1109. <https://doi.org/10.1093/oxfordjournals.aob.a085219>

Google Scholar: [Author Only](#) [Title Only](#) [Author and Title](#)

Dong, X., Hong, Z., Sivaramakrishnan, M., Mahfouz, M., & Verma, D. P. 2005. Callose synthase (CalS5) is required for exine formation during microgametogenesis and for pollen viability in *Arabidopsis*. *The Plant journal : for cell and molecular biology*, 42(3), 315–328. <https://doi.org/10.1111/j.1365-313X.2005.02379.x>

Google Scholar: [Author Only](#) [Title Only](#) [Author and Title](#)

Dong X, Hong Z, Chatterjee J, Kim S, Verma DPS. 2008. Expression of callose synthase genes and its connection with Npr1 signaling pathway during pathogen infection. *Planta*, 229(1), 87–98. <https://doi.org/10.1007/s00425-008-0812-3>

Google Scholar: [Author Only](#) [Title Only](#) [Author and Title](#)

Frankel R, Izhar S, Nitsan J. 1969. Timing of callase activity and cytoplasmic male sterility in *Petunia*. *Biochemical Genetics*, 3(5), 451–455. <https://doi.org/10.1007/BF00485605>

Google Scholar: [Author Only](#) [Title Only](#) [Author and Title](#)

Franklin-Tong VE. 1999. Signaling and the modulation of pollen tube growth. *The Plant cell*, 11(4), 727–738. <https://doi.org/10.1105/tpc.11.4.727>

Google Scholar: [Author Only](#) [Title Only](#) [Author and Title](#)

Fu Z, Yu J, Cheng X, Zong X, Xu J, Chen M, Li Z, Zhang D, & Liang W. 2014. The Rice Basic Helix-Loop-Helix Transcription Factor TDR INTERACTING PROTEIN2 Is a Central Switch in Early Anther Development. *The Plant cell*, 26(4), 1512–1524. <https://doi.org/10.1105/tpc.114.123745>

Google Scholar: [Author Only](#) [Title Only](#) [Author and Title](#)

Heslop-harrison J. 1964. Cell walls, Cell Membranes and Protoplasmic Connections during Meiosis and Pollen Development. In: Linskens HF (ed.). *Pollen, Physiology and Fertilization*. Amsterdam: North Holland Publishers; 1964:3947.

Google Scholar: [Author Only](#) [Title Only](#) [Author and Title](#)

Hiei Y, Ohta S, Komari T, Kumashiro T. 1994. Efficient transformation of rice (*Oryza sativa* L.) mediated by *Agrobacterium* and sequence analysis of the boundaries of the T-DNA. *The Plant journal : for cell and molecular biology*, 6(2), 271–282. <https://doi.org/10.1046/j.1365-313x.1994.6020271.x>

Google Scholar: [Author Only](#) [Title Only](#) [Author and Title](#)

Hong Z, Delauney AJ, Verma DP. 2001. A cell plate-specific callose synthase and its interaction with phragmoplastin. *The Plant cell*, 13(4), 755–768. <https://doi.org/10.1105/tpc.13.4.755>

Google Scholar: [Author Only](#) [Title Only](#) [Author and Title](#)

Huang J, Wang C, Wang H, Lu P, Zheng B, Ma H, Copenhaver GP, Wang Y. 2019. Meiocyte-Specific and AtSPO11-1-Dependent Small RNAs and Their Association with Meiotic Gene Expression and Recombination. *The Plant cell*, 31(2), 444–464. <https://doi.org/10.1105/tpc.18.00511>

Google Scholar: [Author Only](#) [Title Only](#) [Author and Title](#)

Itoh J, Nonomura KI, Ikeda K, Yamaki S, Inukai Y, Yamagishi H, Kitano H, Nagato Y. 2005. Rice plant development: from zygote to spikelet. *Plant & cell physiology*, 46(1), 23–47. <https://doi.org/10.1093/pcp/pci501>

Google Scholar: [Author Only](#) [Title Only](#) [Author and Title](#)

Jacobs AK, Lipka V, Burton RA, Panstruga R, Strizhov N, Schulze-Lefert P, Fincher, GB. 2003. An Arabidopsis Callose Synthase, GSL5, Is Required for Wound and Papillary Callose Formation. *The Plant cell*, 15(11), 2503–2513. <https://doi.org/10.1105/tpc.016097>

Google Scholar: [Author Only](#) [Title Only](#) [Author and Title](#)

Lee DK, Sieburth LE. 2010. Plasmodesmata formation: Poking holes in walls with ise. *Current Biology*, 20(11), R488–R490. <https://doi.org/10.1016/j.cub.2010.03.047>

Google Scholar: [Author Only](#) [Title Only](#) [Author and Title](#)

Lei X, Liu B. 2020. Tapetum-Dependent Male Meiosis Progression in Plants: Increasing Evidence Emerges. *Frontiers in plant science*, 10, 1667. <https://doi.org/10.3389/fpls.2019.01667>

Google Scholar: [Author Only](#) [Title Only](#) [Author and Title](#)

Liu B, De Storme N, Geelen D, 2017. Gibberellin Induces Diploid Pollen Formation by Interfering with Meiotic Cytokinesis. *Plant physiology*, 173(1), 338–353. <https://doi.org/10.1104/pp.16.00480>

Google Scholar: [Author Only](#) [Title Only](#) [Author and Title](#)

Liu H, Ding Y, Zhou Y, Jin W, Xie K, Chen LL. 2017. CRISPR-P 2.0: an improved CRISPR/Cas9 tool for genome editing in plants. *Mo Plant* 10(3):530–532. <https://doi.org/10.1016/j.molp.2017.01.003>

Google Scholar: [Author Only](#) [Title Only](#) [Author and Title](#)

Lucas WJ, Ham BK, Kim JY. 2009. Plasmodesmata - bridging the gap between neighboring plant cells. *Trends in cell biology*, 19(10), 495–503. <https://doi.org/10.1016/j.tcb.2009.07.003>

Google Scholar: [Author Only](#) [Title Only](#) [Author and Title](#)

Maltby D, Carpita NC, Montezinos D, Kulow C, Delmer DP. 1979. B-1,3-glucan in developing cotton fibers: Structure, localization, and relationship of synthesis to that of secondary wall cellulose. *Plant Physiology*, 63(6), 1158–1164. <https://doi.org/10.1104/pp.63.6.1158>

Google Scholar: [Author Only](#) [Title Only](#) [Author and Title](#)

Mamun EA, Cantrill LC, Overall RL, Sutton BG. 2005. Cellular organisation in meiotic and early post-meiotic rice anthers. *Cell biology international*, 29(11), 903–913. <https://doi.org/10.1016/j.cellbi.2005.08.001>

Google Scholar: [Author Only](#) [Title Only](#) [Author and Title](#)

Mikami M, Toki S, Endo M. 2015. Comparison of CRISPR/Cas9 expression constructs for efficient targeted mutagenesis in rice. *Plant Molecular Biology*, 88(6), 561–572. <https://doi.org/10.1007/s11103-015-0342-x>

Google Scholar: [Author Only](#) [Title Only](#) [Author and Title](#)

Mursalimov SR, Baiborodin SI, Sidorchuk YV, Shumny VK, Deineko EV. 2010. Characteristics of the cytomictic channel formation in *Nicotiana tabacum* L. pollen mother cells. *Cytology and Genetics*, 44(1), 14–18. <https://doi.org/10.3103/S0095452710010032>

Google Scholar: [Author Only](#) [Title Only](#) [Author and Title](#)

Mursalimov SR, Sidorchuk YV, Deineko EV. 2013. New insights into cytomixis: Specific cellular features and prevalence in higher plants. *Planta*, 238(3), 415–423. <https://doi.org/10.1007/s00425-013-1914-0>

Google Scholar: [Author Only](#) [Title Only](#) [Author and Title](#)

Musiał K, Kościńska-Pajak M. 2017. Pattern of callose deposition during the course of meiotic diplospory in *Chondrilla juncea* (Asteraceae, Cichorioideae). *Protoplasma*, 254(4), 1499–1505. <https://doi.org/10.1007/s00709-016-1039-y>

Google Scholar: [Author Only](#) [Title Only](#) [Author and Title](#)

Nedukha OM. 2015. Callose: Localization, functions, and synthesis in plant cells. *Cytology and Genetics*, 49(1), 49–57. <https://doi.org/10.3103/S0095452715010090>

Google Scholar: [Author Only](#) [Title Only](#) [Author and Title](#)

Niu N, Liang W, Yang X, Weilin Jin, Zoe A Wilson, Jianping Hu & Dabing Zhang. 2013. EAT1 promotes tapetal cell death by regulating aspartic proteases during male reproductive development in rice. *Nat Commun* 4, 1445. <https://doi.org/10.1038/ncomms2396>

Google Scholar: [Author Only](#) [Title Only](#) [Author and Title](#)

Nonomura KI, Nakano M, Eiguchi M, Suzuki T, Kurata N. 2006. PAIR2 is essential for homologous chromosome synapsis in rice meiosis I. *Journal of cell science*, 119(Pt 2), 217–225. <https://doi.org/10.1242/jcs.02736>

Google Scholar: [Author Only](#) [Title Only](#) [Author and Title](#)

Nonomura KI, Eiguchi M, Nakano M, Takashima K, Komeda N, Fukuchi S, Miyazaki S, Miyao A, Hirochika H, Kurata N. 2011. A novel RNA-recognition-motif protein is required for premeiotic G1/S-phase transition in rice (*Oryza sativa* L.). *PLoS genetics*, 7(1), e1001265. <https://doi.org/10.1371/journal.pgen.1001265>

Google Scholar: [Author Only](#) [Title Only](#) [Author and Title](#)

**Ono S, Liu H, Tsuda K, Fukai E, Tanaka K, Sasaki T, Nonomura KI. 2018. EAT1 transcription factor, a non-cell-autonomous regulator of pollen production, activates meiotic small RNA biogenesis in rice anther tapetum. *PLoS genetics*, 14(2), e1007238. <https://doi.org/10.1371/journal.pgen.1007238>**

Google Scholar: [Author Only](#) [Title Only](#) [Author and Title](#)

**Piršelová B, Matušiková I. 2013. Callose: The plant cell wall polysaccharide with multiple biological functions. *Acta Physiologiae Plantarum*, 35(3), 635–644. <https://doi.org/10.1007/s11738-012-1103-y>**

Google Scholar: [Author Only](#) [Title Only](#) [Author and Title](#)

**Plackett A, Ferguson AC, Powers SJ, Wanchoo-Kohli A, Phillips AL, Wilson ZA, Hedden P, Thomas SG. 2014. DELLA activity is required for successful pollen development in the Columbia ecotype of Arabidopsis. *The New phytologist*, 201(3), 825–836. <https://doi.org/10.1111/nph.12571>**

Google Scholar: [Author Only](#) [Title Only](#) [Author and Title](#)

**Prieu C, Sauquet H, Gouyon PH, Albert B. 2017. More than sixty origins of pantoporate pollen in angiosperms. *American journal of botany*, 104(12), 1837–1845. <https://doi.org/10.3732/ajb.1700289>**

Google Scholar: [Author Only](#) [Title Only](#) [Author and Title](#)

**Qin P, Ting D, Shieh A, McCormick S. 2012. Callose plug deposition patterns vary in pollen tubes of Arabidopsis thaliana ecotypes and tomato species. *BMC plant biology*, 12, 178. <https://doi.org/10.1186/1471-2229-12-178>**

Google Scholar: [Author Only](#) [Title Only](#) [Author and Title](#)

**Radford JE, Vesik M, Overall RL. 1998. Callose deposition at plasmodesmata.**

**Protoplasma**, 201(1–2), 30–37. <https://doi.org/10.1007/BF01280708>

Google Scholar: [Author Only](#) [Title Only](#) [Author and Title](#)

**Roschttardt H, Conéjéro G, Divol F, Alcon C, Verdeil JL, Curie C, Mari S. 2013. New insights into Fe localization in plant tissues. *Frontiers in plant science*, 4, 350. <https://doi.org/10.3389/fpls.2013.00350>**

Google Scholar: [Author Only](#) [Title Only](#) [Author and Title](#)

**Sager RE, Lee JY. 2018. Plasmodesmata at a glance. *Journal of cell science*, 131(11), jcs209346. <https://doi.org/10.1242/jcs.209346>**

Google Scholar: [Author Only](#) [Title Only](#) [Author and Title](#)

**Seale M. 2020. Callose Deposition during Pollen Development. *Plant physiology*, 184(2), 564–565. <https://doi.org/10.1104/pp.20.01143>**

Google Scholar: [Author Only](#) [Title Only](#) [Author and Title](#)

**Scott RJ, Spielman M, Dickinson HG. 2004. Stamen structure and function. *The Plant cell*, Volume 16, Issue suppl\_1, June 2004, Pages S46–S60. <https://doi.org/10.1105/tpc.017012>**

Google Scholar: [Author Only](#) [Title Only](#) [Author and Title](#)

**Shakirov EV, Surovtseva, YV, Osbun N, Shippen DE. 2005. The Arabidopsis Pot1 and Pot2 proteins function in telomere length homeostasis and chromosome end protection. *Molecular and cellular biology*, 25(17), 7725–7733. <https://doi.org/10.1128/MCB.25.17.7725-7733.2005>**

Google Scholar: [Author Only](#) [Title Only](#) [Author and Title](#)

**Shi X, Sun X, Zhang Z, Feng D, Zhang Q, Han L, Wu J, Lu T. 2015. GLUCAN SYNTHASE-LIKE 5 (GSL5) plays an essential role in male fertility by regulating callose metabolism during microsporogenesis in rice. *Plant & cell physiology*, 56(3), 497–509. <https://doi.org/10.1093/pcp/pcu193>**

Google Scholar: [Author Only](#) [Title Only](#) [Author and Title](#)

**Shivanna KR. 2003. Pollen Biology and Biotechnology. Science Publishers. Plymouth.**

Google Scholar: [Author Only](#) [Title Only](#) [Author and Title](#)

**Song, L., Wang, R., Zhang, L., Wang, Y., & Yao, S. 2016. CRR1 encoding callose synthase functions in ovary expansion by affecting vascular cell patterning in rice. *The Plant journal : for cell and molecular biology*, 88(4), 620–632. <https://doi.org/10.1111/tpj.13287>**

Google Scholar: [Author Only](#) [Title Only](#) [Author and Title](#)

**Staehelein L A, Hepler PK. 1996. Cytokinesis in higher plants. *Cell*, 84(6), 821–824. [https://doi.org/10.1016/s0092-8674\(00\)81060-0](https://doi.org/10.1016/s0092-8674(00)81060-0)**

Google Scholar: [Author Only](#) [Title Only](#) [Author and Title](#)

**Steer MW. 1977. Differentiation of the tapetum in Avena. I. The cell surface. *Journal of cell science*, 25, 125–138. <https://doi.org/10.1242/jcs.25.1.125>**

Google Scholar: [Author Only](#) [Title Only](#) [Author and Title](#)

**Stone BA, Clarke AE. 1992. Chemistry and Biology of (1-3)-β-D-Glucans. La Trobe University Press. 10.1016/B978-0-12-373971-1.X0001-5**

Google Scholar: [Author Only](#) [Title Only](#) [Author and Title](#)

**Stieglitz H, Stern H. 1973. Regulation of  $\beta$ -1,3-glucanase activity in developing anthers of *Lilium*. *Dev. Biol.* 34, 169–173.**

[https://doi.org/10.1016/0012-1606\(73\)90347-3](https://doi.org/10.1016/0012-1606(73)90347-3)

Google Scholar: [Author Only](#) [Title Only](#) [Author and Title](#)

**Thiele K, Wanner G, Kindzierski V, Jürgens G, Mayer U, Pachel F, Assaad FF. 2009. The timely deposition of callose is essential for cytokinesis in *Arabidopsis*. *The Plant Journal*, 58: 13-26. <https://doi.org/10.1111/j.1365-3113X.2008.03760.x>**

Google Scholar: [Author Only](#) [Title Only](#) [Author and Title](#)

**Tsuda K, Chuck G. 2019. Heat Induced Epitope Retrieval (HIER) Assisted Protein Immunostaining in Maize. *Bio-101*: e3260. DOI: 10.21769/BioProtoc.3260.**

Google Scholar: [Author Only](#) [Title Only](#) [Author and Title](#)

**Unal M, Vardar F, Ayturk zlem. 2013. Callose in plant sexual reproduction. In M. Silva-Opps (Ed.), *Current Progress in Biological Research*. InTech. <https://doi.org/10.5772/53001>**

Google Scholar: [Author Only](#) [Title Only](#) [Author and Title](#)

**Voigt CA. 2014. Callose-mediated resistance to pathogenic intruders in plant defense-related papillae. *Frontiers in plant science*, 5, 168. <https://doi.org/10.3389/fpls.2014.00168>**

Google Scholar: [Author Only](#) [Title Only](#) [Author and Title](#)

**Wan L, Zha W, Cheng X, Liu C, Lv L, Liu C, Wang Z, Du B, Chen R, Zhu L, He G. 2011. A rice  $\beta$ -1,3-glucanase gene *Osg1* is required for callose degradation in pollen development. *Planta*, 233(2), 309–323. <https://doi.org/10.1007/s00425-010-1301-z>**

Google Scholar: [Author Only](#) [Title Only](#) [Author and Title](#)

**Wang M, Wang K, Tang D, Wei C, Li M, Shen Y, Chi Z, Gu M, Cheng Z. 2010. The central element protein ZEP1 of the synaptonemal complex regulates the number of crossovers during meiosis in rice. *The Plant cell*, 22(2), 417–430. <https://doi.org/10.1105/tpc.109.070789>**

Google Scholar: [Author Only](#) [Title Only](#) [Author and Title](#)

**Werner D, Gerlitz N, Stadler R. 2011. A dual switch in phloem unloading during ovule development in *Arabidopsis*. *Protoplasma*, 248(1), 225–235. <https://doi.org/10.1007/s00709-010-0223-8>**

Google Scholar: [Author Only](#) [Title Only](#) [Author and Title](#)

**Xie B, Wang X, Zhu M, Zhang Z, Hong Z. 2011. *CalS7* encodes a callose synthase responsible for callose deposition in the phloem. *The Plant journal : for cell and molecular biology*, 65(1), 1–14. <https://doi.org/10.1111/j.1365-3113X.2010.04399.x>**

Google Scholar: [Author Only](#) [Title Only](#) [Author and Title](#)

**Yamaguchi T, Hayashi T, Nakayama K, Koike S. 2006. Expression analysis of genes for callose synthases and Rho-type small GTP-binding proteins that are related to callose synthesis in rice anther. *Bioscience, biotechnology, and biochemistry*, 70(3), 639–645. <https://doi.org/10.1271/bbb.70.639>**

Google Scholar: [Author Only](#) [Title Only](#) [Author and Title](#)

**Yim KO, Bradford KJ. 1998. Callose deposition is responsible for apoplastic semipermeability of the endosperm envelope of muskmelon seeds1. *Plant Physiology*, 118(1), 83–90. <https://doi.org/10.1104/pp.118.1.83>**

Google Scholar: [Author Only](#) [Title Only](#) [Author and Title](#)

**Zavaliev R, Ueki S, Epel BL, Citovsky V. 2011. Biology of callose ( $\beta$ -1,3-glucan) turnover at plasmodesmata. *Protoplasma*, 248(1), 117–130. <https://doi.org/10.1007/s00709-010-0247-0>**

Google Scholar: [Author Only](#) [Title Only](#) [Author and Title](#)

**Zhai J, Zhang H, Arikat S, Huang K, Nan GL, Walbot V, Meyers BC. 2015. Spatiotemporally dynamic, cell-type-dependent premeiotic and meiotic phasiRNAs in maize anthers. *Proceedings of the National Academy of Sciences of the United States of America*, 112(10), 3146–3151. <https://doi.org/10.1073/pnas.1418918112>**

Google Scholar: [Author Only](#) [Title Only](#) [Author and Title](#)

**Zhang D, Wilson ZA. 2009. Stamen specification and anther development in rice. *Chinese Science Bulletin*, 54(14), 2342–2353.**

Google Scholar: [Author Only](#) [Title Only](#) [Author and Title](#)

<https://doi.org/10.1007/s11434-009-0348-3>

**Zhang F, Tang D, Shen Y, Xue Z, Shi W, Ren L, Du G, Li Y, Cheng Z. 2017. The F-Box Protein ZYGO1 Mediates Bouquet Formation to Promote Homologous Pairing, Synapsis, and Recombination in Rice Meiosis. *The Plant cell*, 29(10), 2597–2609. <https://doi.org/10.1105/tpc.17.00287>**

Google Scholar: [Author Only](#) [Title Only](#) [Author and Title](#)

**Zhang C, Shen Y, Tang D, Shi W, Zhang D, Du G, Zhou Y, Liang G, Li Y, Cheng Z. 2018. The zinc finger protein DCM1 is required for male meiotic cytokinesis by preserving callose in rice. *PLOS Genetics*, 14(11), e1007769. <https://doi.org/10.1371/journal.pgen.1007769>**

Google Scholar: [Author Only](#) [Title Only](#) [Author and Title](#)

bioRxiv preprint doi: <https://doi.org/10.1101/2022.05.24.493269>; this version posted May 24, 2022. The copyright holder for this preprint (which was not certified by peer review) is the author/funder, who has granted bioRxiv a license to display the preprint in perpetuity. It is made available under a [CC-BY-NC-ND 4.0 International license](#).

**Zhao T, Ren L, Chen X, Yu H, Liu C, Shen Y, Shi W, Tang D, Du G, Li Y, Ma B, Cheng Z. 2018. The OsRR24/LEPTO1 Type-B Response Regulator is Essential for the Organization of Leptotene Chromosomes in Rice Meiosis. The Plant cell, 30(12), 3024–3037. <https://doi.org/10.1105/tpc.18.00479>**

Google Scholar: [Author Only](#) [Title Only](#) [Author and Title](#)

### **Preprint repository**

**Mimura M, Ono S, Nonomura KI. 2021. Rice MEL2 regulates the timing of meiotic transition as a component of cytoplasmic RNA granules. bioRxiv. doi: <https://doi.org/10.1101/2021.03.24.433842>**

Google Scholar: [Author Only](#) [Title Only](#) [Author and Title](#)
